# Supplementary material for: Umbilical Vein Blood Flow in Uncomplicated Pregnancies: Systematic Review of Available Reference Charts and Comparison with a New Cohort
Source: MDPI journal article supplement (doi:10.3390/jcm12093132), 2023-04-26
Supplement: s1 [file s1]

Supplementary material for the manuscript

**“Umbilical vein blood flow in uncomplicated pregnancies:  
systematic review of available reference charts and  
comparison with a new cohort”**

**Moira Barbieri<sup>1</sup>, Giulia Zamagni<sup>2</sup>, Ilaria Fantasia<sup>1</sup>, Lorenzo Monasta<sup>2</sup>, Leila Lo Bello<sup>1</sup>, Mariachiara  
Quadrifoglio<sup>1</sup>, Giuseppe Ricci<sup>1,3</sup>, Gianpaolo Maso<sup>1</sup>, Monica Piccoli<sup>1</sup>, Daniela D. Di Martino<sup>4</sup>, Enrico M.  
Ferrazzi<sup>4,5</sup>, Tamara Stampalija<sup>1,3,\*</sup>**

**Figure S1.** Risk of bias author's judgement review based on Quality Assessment of Diagnostic Accuracy Studies Tool (QUADAS). (a) Risk of bias in each domain are presented as percentages across included studies. *Green, low risk of bias; red, high risk of bias; yellow, some concerns of bias; blue, unclear risk of bias.* (b) Concerns regarding applicability.

a)

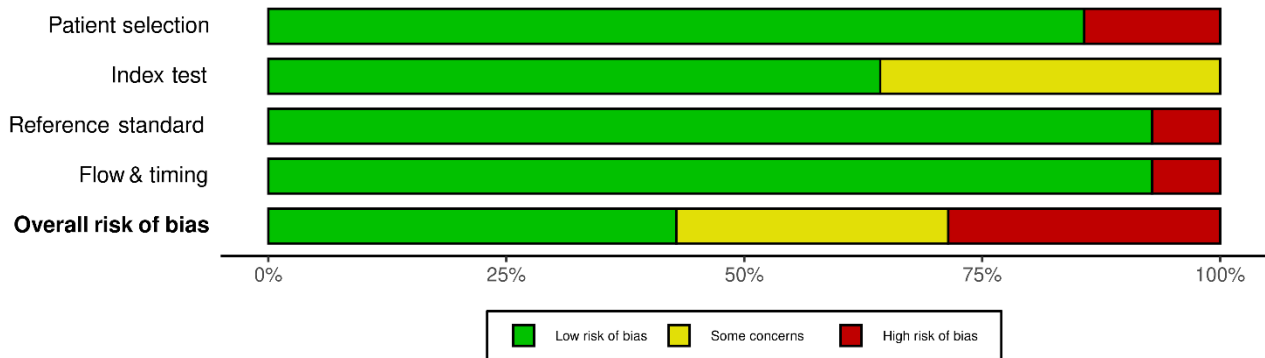

b)

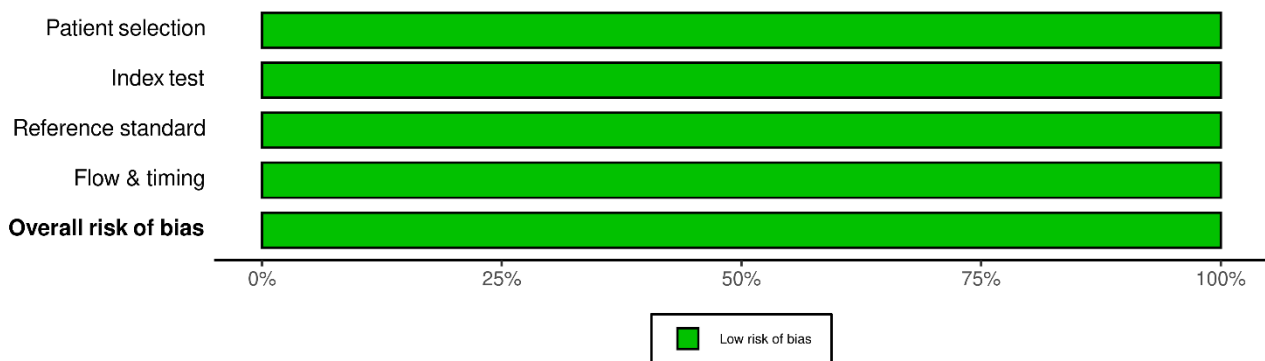

**Figure S2:** The Figure represents umbilical vein blood flow volume (UV-Q) central values in low-risk and general population in studies that investigated UV-Q in an intra-abdominal (IA) portion of the umbilical vein: a) UV-Q absolute value; and b) normalized for estimated fetal weight (UV-Q/EFW). Different colors represent the first author's name and the year of publication.

**a)**

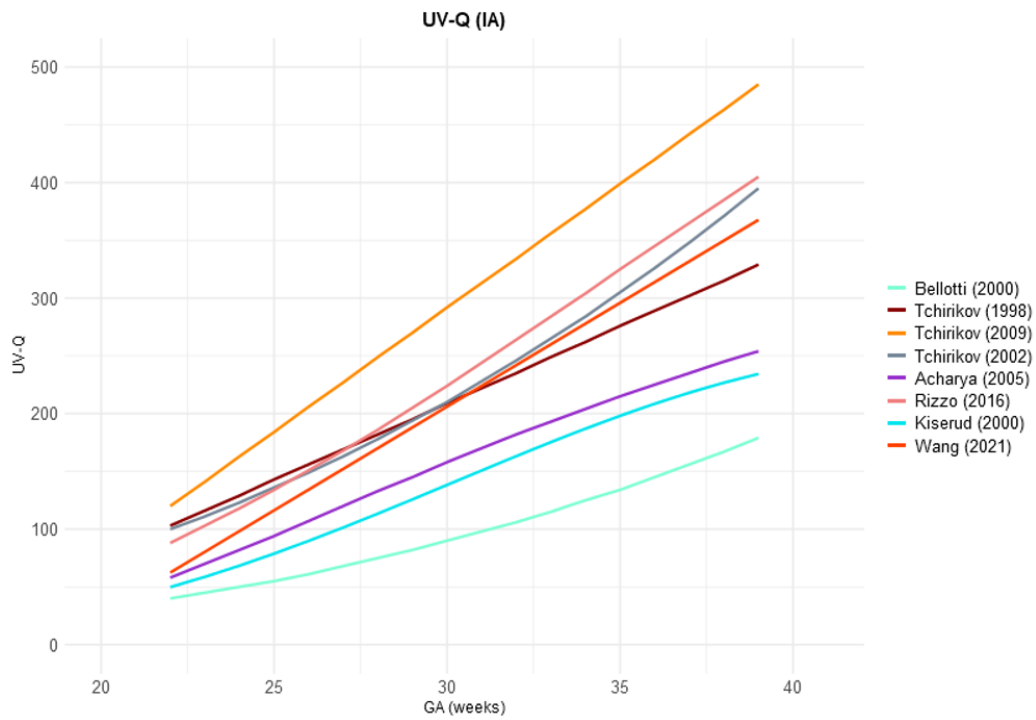

**b)**

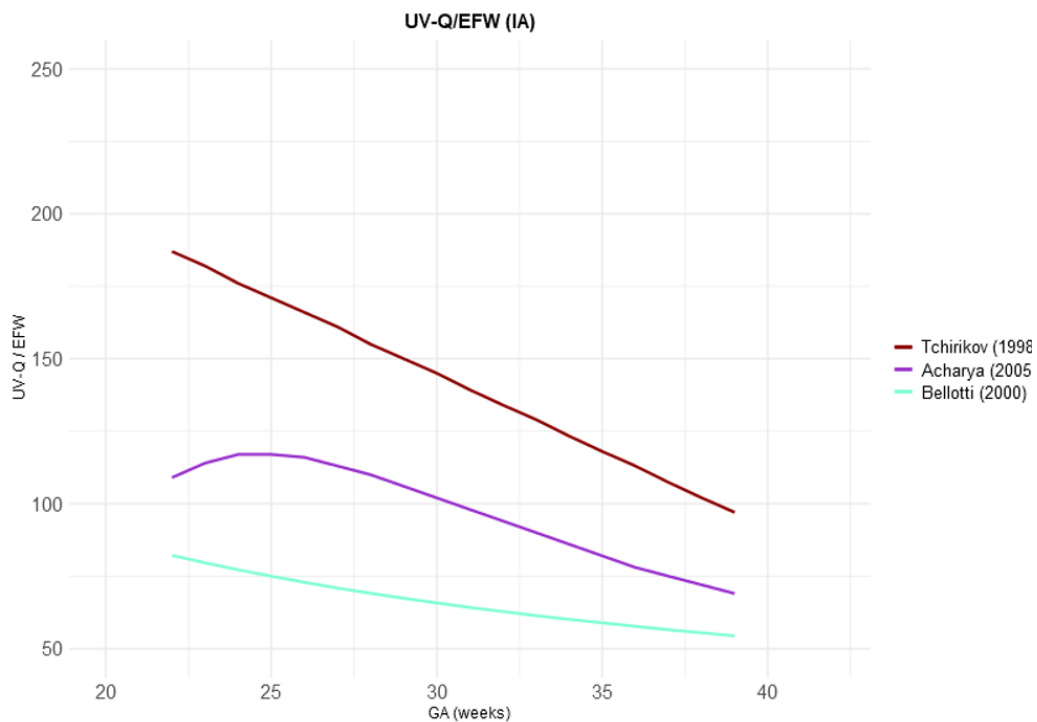

**Figure S3:** The Figure represents umbilical vein blood flow volume (UV-Q) central values in low-risk and general population in studies that investigated UV-Q on a free-floating (FF) portion of the umbilical cord: a) UV-Q absolute value; and b) normalized for estimated fetal weight (UV-Q/EFW). Different colors represent the first author's name and the year of publication.

a)

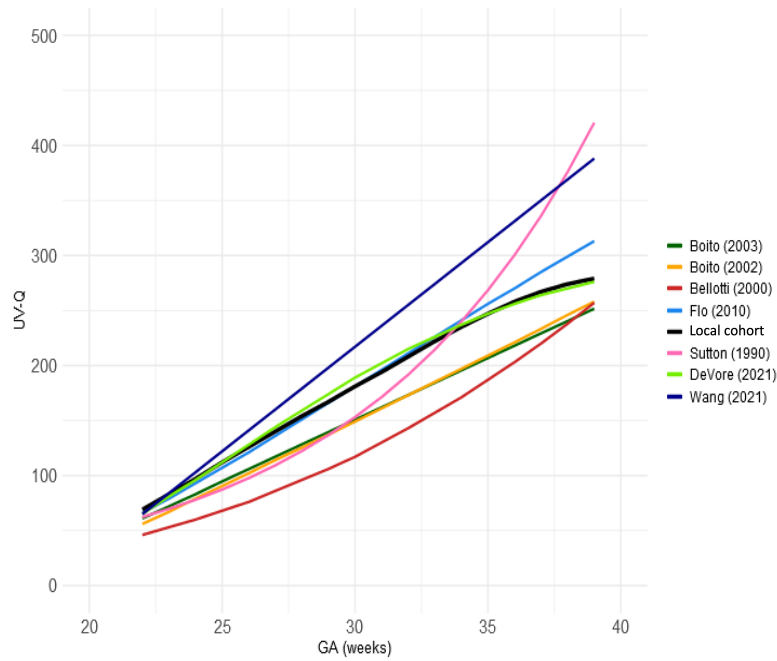

b)

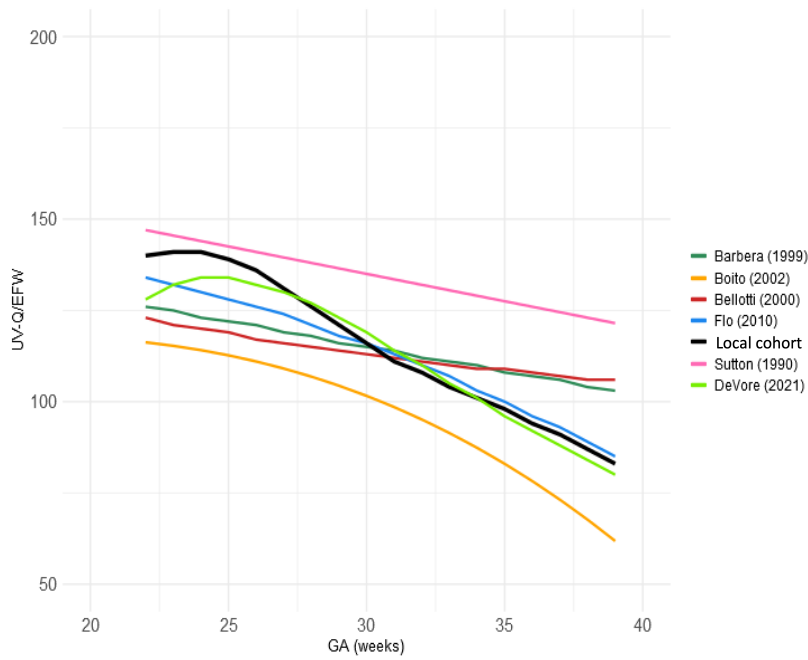

**Table S1.** Literature search strategy in Pubmed and Scopus.

We ran the following search strategy in **PubMed** and **Scopus** until December 2021:

| Library | Search terms                                                                                                                                            | Results |
|---------|---------------------------------------------------------------------------------------------------------------------------------------------------------|---------|
| PubMed  | (umbilical vein blood flow) OR (umbilical venous blood flow) AND (volume)                                                                               | 283     |
| Scopus  | (TITLE-ABS-KEY(umbilical vein blood flow) OR TITLE-ABS-KEY(umbilical venous blood flow) AND TITLE-ABS-KEY(volume)) AND ( LIMIT-TO ( SUBJAREA,"MEDI" ) ) | 304     |

**Table S2.** The Table represents the 5<sup>th</sup>, 10<sup>th</sup>, 50<sup>th</sup>, 90<sup>th</sup> and 95<sup>th</sup> sex-specific percentiles for umbilical vein blood flow volume (UV-Q), UV-Q normalized for estimated fetal weight (UV-Q/EFW) and UV-Q normalized for the abdominal circumference (UV-Q/AC) from our local cohort.

| GA<br>(week) | UV-Q           |      |      |      |      |              |      |      |      |      | UV-Q/EFW       |      |      |      |      |              |      |      |      |      | UV-Q/AC        |      |      |      |      |              |      |      |      |      |
|--------------|----------------|------|------|------|------|--------------|------|------|------|------|----------------|------|------|------|------|--------------|------|------|------|------|----------------|------|------|------|------|--------------|------|------|------|------|
|              | Female fetuses |      |      |      |      | Male fetuses |      |      |      |      | Female fetuses |      |      |      |      | Male fetuses |      |      |      |      | Female fetuses |      |      |      |      | Male fetuses |      |      |      |      |
|              | 5th            | 10th | 50th | 90th | 95th | 5th          | 10th | 50th | 90th | 95th | 5th            | 10th | 50th | 90th | 95th | 5th          | 10th | 50th | 90th | 95th | 5th            | 10th | 50th | 90th | 95th | 5th          | 10th | 50th | 90th | 95th |
| 20           | 17             | 29   | 41   | 52   | 37   | 17           | 29   | 41   | 52   | 37   | 101            | 109  | 142  | 183  | 197  | 91           | 100  | 134  | 173  | 185  | 0.19           | 0.22 | 0.29 | 0.39 | 0.43 | 0.18         | 0.21 | 0.31 | 0.41 | 0.44 |
| 21           | 25             | 38   | 55   | 70   | 55   | 25           | 38   | 55   | 70   | 55   | 101            | 109  | 142  | 184  | 197  | 93           | 101  | 135  | 174  | 186  | 0.23           | 0.25 | 0.34 | 0.46 | 0.51 | 0.21         | 0.24 | 0.35 | 0.46 | 0.50 |
| 22           | 34             | 49   | 69   | 89   | 74   | 34           | 49   | 69   | 89   | 74   | 101            | 109  | 142  | 184  | 198  | 94           | 102  | 136  | 175  | 187  | 0.26           | 0.29 | 0.39 | 0.52 | 0.58 | 0.23         | 0.27 | 0.39 | 0.52 | 0.56 |
| 23           | 43             | 61   | 85   | 110  | 94   | 43           | 61   | 85   | 110  | 94   | 101            | 109  | 142  | 184  | 197  | 94           | 103  | 136  | 176  | 188  | 0.30           | 0.33 | 0.44 | 0.59 | 0.66 | 0.26         | 0.30 | 0.43 | 0.57 | 0.62 |
| 24           | 54             | 72   | 101  | 130  | 117  | 54           | 72   | 101  | 130  | 117  | 100            | 108  | 141  | 182  | 195  | 94           | 102  | 136  | 177  | 189  | 0.33           | 0.36 | 0.49 | 0.66 | 0.73 | 0.28         | 0.33 | 0.47 | 0.62 | 0.68 |
| 25           | 65             | 83   | 114  | 148  | 138  | 65           | 83   | 114  | 148  | 138  | 98             | 106  | 138  | 178  | 191  | 92           | 101  | 135  | 176  | 189  | 0.36           | 0.39 | 0.53 | 0.71 | 0.79 | 0.31         | 0.35 | 0.51 | 0.68 | 0.73 |
| 26           | 74             | 92   | 126  | 165  | 158  | 74           | 92   | 126  | 165  | 158  | 95             | 102  | 133  | 172  | 184  | 90           | 98   | 133  | 174  | 186  | 0.38           | 0.42 | 0.57 | 0.76 | 0.84 | 0.33         | 0.38 | 0.55 | 0.73 | 0.79 |
| 27           | 83             | 100  | 137  | 180  | 176  | 83           | 100  | 137  | 180  | 176  | 91             | 98   | 127  | 164  | 176  | 86           | 95   | 130  | 170  | 182  | 0.40           | 0.45 | 0.60 | 0.81 | 0.89 | 0.35         | 0.40 | 0.58 | 0.77 | 0.84 |
| 28           | 91             | 109  | 145  | 194  | 193  | 91           | 109  | 145  | 194  | 193  | 86             | 93   | 121  | 156  | 167  | 83           | 91   | 126  | 165  | 177  | 0.42           | 0.47 | 0.63 | 0.85 | 0.94 | 0.37         | 0.43 | 0.61 | 0.82 | 0.88 |
| 29           | 99             | 117  | 159  | 210  | 209  | 99           | 117  | 159  | 210  | 209  | 82             | 89   | 115  | 148  | 159  | 78           | 87   | 121  | 159  | 170  | 0.44           | 0.49 | 0.66 | 0.89 | 0.98 | 0.39         | 0.45 | 0.64 | 0.86 | 0.93 |
| 30           | 107            | 128  | 172  | 229  | 227  | 107          | 128  | 172  | 229  | 227  | 79             | 85   | 111  | 142  | 153  | 74           | 83   | 117  | 153  | 163  | 0.47           | 0.51 | 0.69 | 0.93 | 1.03 | 0.41         | 0.47 | 0.67 | 0.90 | 0.97 |
| 31           | 117            | 140  | 188  | 251  | 248  | 117          | 140  | 188  | 251  | 248  | 78             | 84   | 108  | 140  | 150  | 70           | 79   | 112  | 147  | 157  | 0.49           | 0.54 | 0.73 | 0.98 | 1.08 | 0.42         | 0.49 | 0.70 | 0.93 | 1.01 |
| 32           | 129            | 154  | 205  | 275  | 272  | 129          | 154  | 205  | 275  | 272  | 77             | 83   | 108  | 139  | 149  | 67           | 76   | 108  | 141  | 150  | 0.51           | 0.56 | 0.76 | 1.02 | 1.13 | 0.44         | 0.50 | 0.72 | 0.96 | 1.04 |
| 33           | 142            | 168  | 223  | 300  | 299  | 142          | 168  | 223  | 300  | 299  | 76             | 82   | 107  | 138  | 148  | 64           | 73   | 104  | 135  | 144  | 0.53           | 0.59 | 0.79 | 1.07 | 1.18 | 0.45         | 0.52 | 0.75 | 0.99 | 1.07 |
| 34           | 155            | 180  | 240  | 323  | 327  | 155          | 180  | 240  | 323  | 327  | 74             | 80   | 105  | 136  | 146  | 61           | 70   | 99   | 129  | 138  | 0.55           | 0.61 | 0.82 | 1.10 | 1.22 | 0.46         | 0.53 | 0.77 | 1.02 | 1.11 |
| 35           | 166            | 189  | 255  | 343  | 351  | 166          | 189  | 255  | 343  | 351  | 70             | 77   | 102  | 133  | 143  | 58           | 66   | 95   | 124  | 132  | 0.56           | 0.62 | 0.83 | 1.12 | 1.24 | 0.48         | 0.55 | 0.79 | 1.05 | 1.13 |
| 36           | 174            | 197  | 269  | 363  | 373  | 174          | 197  | 269  | 363  | 373  | 66             | 73   | 99   | 130  | 139  | 55           | 63   | 90   | 118  | 126  | 0.56           | 0.62 | 0.84 | 1.13 | 1.25 | 0.49         | 0.56 | 0.80 | 1.07 | 1.16 |
| 37           | 180            | 201  | 281  | 381  | 394  | 180          | 201  | 281  | 381  | 394  | 62             | 68   | 95   | 127  | 136  | 52           | 59   | 85   | 112  | 119  | 0.56           | 0.62 | 0.83 | 1.12 | 1.24 | 0.50         | 0.57 | 0.82 | 1.10 | 1.19 |
| 38           | 182            | 204  | 294  | 401  | 414  | 182          | 204  | 294  | 401  | 414  | 56             | 64   | 92   | 124  | 134  | 49           | 56   | 80   | 105  | 112  | 0.55           | 0.61 | 0.82 | 1.10 | 1.22 | 0.51         | 0.58 | 0.84 | 1.12 | 1.21 |
| 39           | 181            | 203  | 306  | 421  | 434  | 181          | 203  | 306  | 421  | 434  | 51             | 59   | 90   | 123  | 132  | 47           | 53   | 76   | 99   | 106  | 0.54           | 0.59 | 0.80 | 1.08 | 1.19 | 0.52         | 0.60 | 0.86 | 1.14 | 1.24 |
| 40           | 177            | 200  | 318  | 441  | 455  | 177          | 200  | 318  | 441  | 455  | 44             | 54   | 88   | 121  | 130  | 44           | 50   | 71   | 93   | 99   | 0.52           | 0.57 | 0.77 | 1.04 | 1.15 | 0.53         | 0.61 | 0.88 | 1.17 | 1.26 |
| 41           | 167            | 193  | 331  | 461  | 476  | 167          | 193  | 331  | 461  | 476  | 38             | 49   | 86   | 119  | 128  | 42           | 47   | 66   | 86   | 92   | 0.50           | 0.55 | 0.75 | 1.00 | 1.11 | 0.54         | 0.62 | 0.89 | 1.19 | 1.29 |

**Table S3.** The Table represents the central values for umbilical vein blood flow volume (UV-Q) of each manuscript included in this systematic review.

|                   | <b>UV-Q</b>                  |                       |                    |                 |                   |                   |                           |                    |                                |                   |                       |                     |                       |                           |                     |                       |
|-------------------|------------------------------|-----------------------|--------------------|-----------------|-------------------|-------------------|---------------------------|--------------------|--------------------------------|-------------------|-----------------------|---------------------|-----------------------|---------------------------|---------------------|-----------------------|
|                   | <b>Free-floating portion</b> |                       |                    |                 |                   |                   |                           |                    | <b>Intra-abdominal portion</b> |                   |                       |                     |                       |                           |                     |                       |
| <b>GA (weeks)</b> | <b>LOCAL COHORT</b>          | <b>Wang 2021 (FL)</b> | <b>DeVore 2021</b> | <b>Flo 2010</b> | <b>Boito 2003</b> | <b>Boito 2002</b> | <b>Bellotti 2000 (FL)</b> | <b>Sutton 1990</b> | <b>Wang 2021 (IA)</b>          | <b>Rizzo 2016</b> | <b>Tchirikov 2009</b> | <b>Acharya 2005</b> | <b>Tchirikov 2002</b> | <b>Bellotti 2000 (IA)</b> | <b>Kiserud 2000</b> | <b>Tchirikov 1998</b> |
| 22                | 69                           | 65                    | 65                 | 66              | 61                | 56                | 46                        | 62                 | 62                             | 88                | 120                   | 58                  | 100                   | 40                        | 50                  | 103                   |
| 23                | 83                           | 84                    | 81                 | 79              | 72                | 67                | 53                        | 70                 | 80                             | 103               | 141                   | 70                  | 111                   | 45                        | 59                  | 116                   |
| 24                | 97                           | 103                   | 96                 | 93              | 83                | 79                | 60                        | 78                 | 98                             | 118               | 163                   | 82                  | 123                   | 50                        | 68                  | 129                   |
| 25                | 112                          | 122                   | 112                | 107             | 95                | 90                | 68                        | 87                 | 116                            | 134               | 184                   | 94                  | 136                   | 55                        | 79                  | 143                   |
| 26                | 126                          | 141                   | 128                | 121             | 106               | 102               | 76                        | 98                 | 134                            | 151               | 206                   | 107                 | 149                   | 61                        | 90                  | 156                   |
| 27                | 140                          | 160                   | 144                | 136             | 117               | 114               | 86                        | 109                | 152                            | 168               | 227                   | 120                 | 163                   | 68                        | 101                 | 169                   |
| 28                | 154                          | 179                   | 159                | 151             | 128               | 125               | 96                        | 122                | 170                            | 186               | 249                   | 133                 | 178                   | 75                        | 113                 | 182                   |
| 29                | 167                          | 198                   | 174                | 166             | 139               | 137               | 106                       | 137                | 188                            | 205               | 270                   | 145                 | 194                   | 82                        | 126                 | 195                   |
| 30                | 181                          | 217                   | 189                | 181             | 151               | 149               | 117                       | 153                | 206                            | 224               | 292                   | 158                 | 210                   | 90                        | 138                 | 209                   |
| 31                | 194                          | 236                   | 202                | 196             | 162               | 161               | 130                       | 171                | 224                            | 244               | 313                   | 170                 | 228                   | 98                        | 151                 | 222                   |
| 32                | 208                          | 255                   | 215                | 211             | 173               | 173               | 143                       | 192                | 242                            | 264               | 334                   | 182                 | 246                   | 106                       | 163                 | 235                   |
| 33                | 222                          | 274                   | 226                | 226             | 184               | 185               | 157                       | 214                | 260                            | 284               | 356                   | 193                 | 265                   | 115                       | 175                 | 249                   |
| 34                | 235                          | 293                   | 237                | 241             | 196               | 197               | 171                       | 240                | 278                            | 304               | 377                   | 204                 | 284                   | 125                       | 187                 | 262                   |
| 35                | 247                          | 312                   | 247                | 256             | 207               | 209               | 187                       | 268                | 296                            | 325               | 399                   | 215                 | 305                   | 134                       | 198                 | 276                   |
| 36                | 258                          | 331                   | 256                | 270             | 218               | 221               | 203                       | 300                | 314                            | 345               | 420                   | 225                 | 326                   | 145                       | 209                 | 289                   |
| 37                | 267                          | 350                   | 264                | 285             | 229               | 233               | 220                       | 336                | 332                            | 365               | 442                   | 235                 | 348                   | 156                       | 218                 | 302                   |
| 38                | 274                          | 369                   | 270                | 299             | 240               | 246               | 238                       | 376                | 350                            | 385               | 463                   | 245                 | 371                   | 167                       | 227                 | 315                   |
| 39                | 279                          | 388                   | 276                | 313             | 252               | 258               | 257                       | 421                | 368                            | 405               | 485                   | 254                 | 395                   | 179                       | 234                 | 329                   |

**Table S4.** The Table represents the central values for umbilical vein blood flow volume normalized for estimated fetal weight (UV-Q/EFW) of each manuscript included in this systematic review.

|                   | <b>UV-Q/EFW</b>              |                    |                 |                   |                           |                     |                    |                                |                       |                           |
|-------------------|------------------------------|--------------------|-----------------|-------------------|---------------------------|---------------------|--------------------|--------------------------------|-----------------------|---------------------------|
|                   | <b>Free-floating portion</b> |                    |                 |                   |                           |                     |                    | <b>Intra-abdominal portion</b> |                       |                           |
| <b>GA (weeks)</b> | <b>LOCAL COHORT</b>          | <b>DeVore 2021</b> | <b>Flo 2010</b> | <b>Boito 2002</b> | <b>Bellotti 2000 (FL)</b> | <b>Barbera 2000</b> | <b>Sutton 1990</b> | <b>Acharya 2005</b>            | <b>Tchirikov 1998</b> | <b>Bellotti 2000 (IA)</b> |
| 22                | 140                          | 128                | 66              | 116               | 123                       | 126                 | 147                | 109                            | 187                   | 82                        |
| 23                | 141                          | 132                | 79              | 115               | 121                       | 125                 | 145.5              | 114                            | 182                   | 80                        |
| 24                | 141                          | 134                | 93              | 114               | 120                       | 123                 | 144                | 117                            | 176                   | 77                        |
| 25                | 139                          | 134                | 107             | 113               | 119                       | 122                 | 142.5              | 117                            | 171                   | 75                        |
| 26                | 136                          | 132                | 121             | 111               | 117                       | 121                 | 141                | 116                            | 166                   | 73                        |
| 27                | 131                          | 130                | 136             | 109               | 116                       | 119                 | 139.5              | 113                            | 161                   | 71                        |
| 28                | 126                          | 127                | 151             | 107               | 115                       | 118                 | 138                | 110                            | 155                   | 69                        |
| 29                | 121                          | 123                | 166             | 104               | 114                       | 116                 | 136.5              | 106                            | 150                   | 67                        |
| 30                | 116                          | 119                | 181             | 102               | 113                       | 115                 | 135                | 102                            | 145                   | 66                        |
| 31                | 111                          | 114                | 196             | 99                | 112                       | 114                 | 133.5              | 98                             | 139                   | 64                        |
| 32                | 108                          | 110                | 211             | 95                | 111                       | 112                 | 132                | 94                             | 134                   | 63                        |
| 33                | 104                          | 105                | 226             | 91                | 110                       | 111                 | 130.5              | 90                             | 129                   | 61                        |
| 34                | 101                          | 101                | 241             | 87                | 109                       | 110                 | 129                | 86                             | 123                   | 60                        |
| 35                | 98                           | 96                 | 256             | 83                | 109                       | 108                 | 127.5              | 82                             | 118                   | 59                        |
| 36                | 94                           | 92                 | 270             | 78                | 108                       | 107                 | 126                | 78                             | 113                   | 58                        |
| 37                | 91                           | 88                 | 285             | 73                | 107                       | 106                 | 124.5              | 75                             | 107                   | 57                        |
| 38                | 87                           | 84                 | 299             | 68                | 106                       | 104                 | 123                | 72                             | 102                   | 55                        |
| 39                | 83                           | 80                 | 313             | 62                | 106                       | 103                 | 121.5              | 69                             | 97                    | 54                        |
